# Supplementary material
Source: publisher figshare collection journal article supplement (https://frontiersin.figshare.com/ndownloader/files/14081240)
Supplement: Supplementary file [file 14081240]

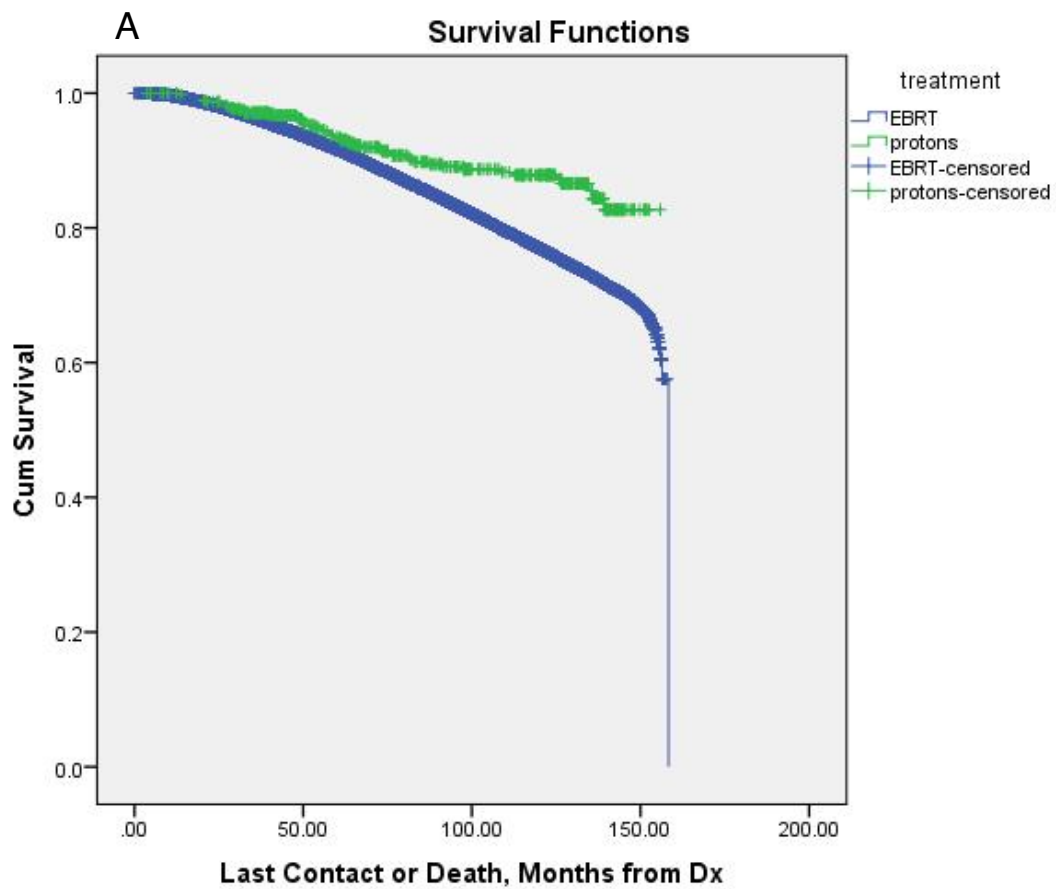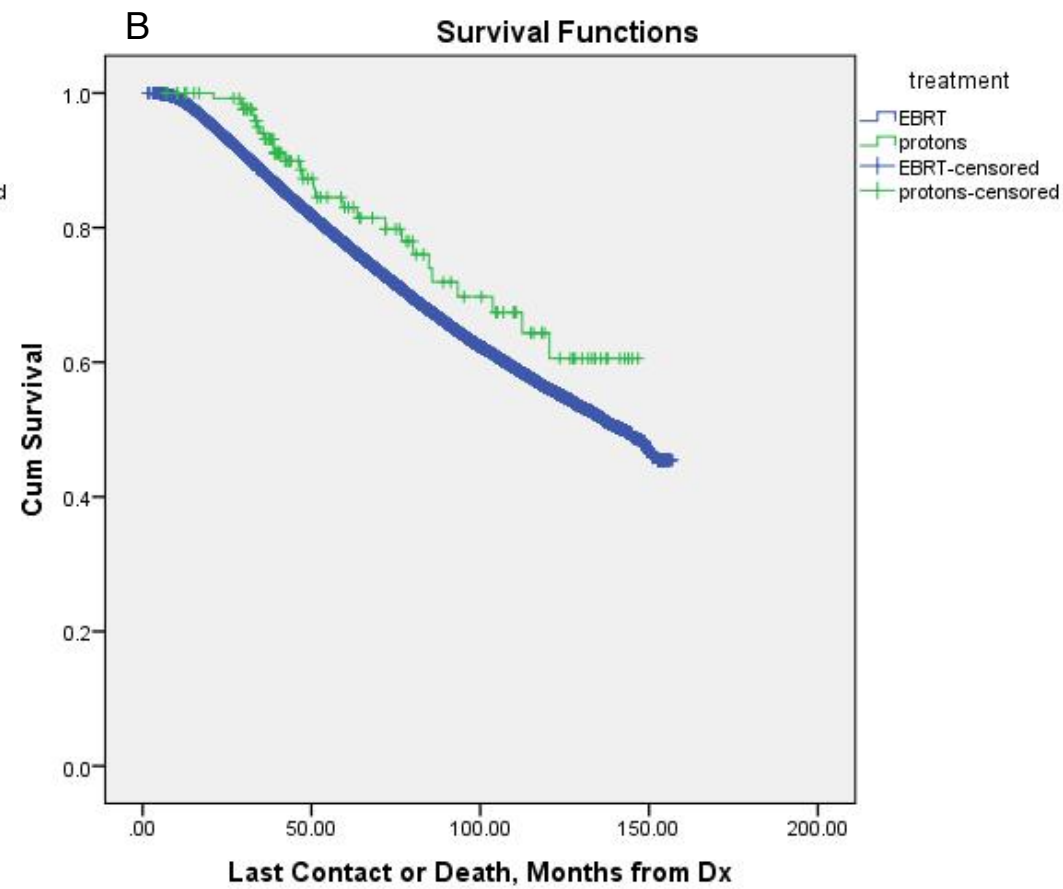

**Supplemental Figure 2:** Overall Survival with Proton vs. Non-Proton EBRT in Breast Conservation (A) and Mastectomy (B) Cohorts

Breast Conservation Cohort

5-year Overall Survival

- Non-Proton (EBRT): 91.7%
- Protons: 92.3%

p-value<0.001

Mastectomy Cohort

5-year Overall Survival

- Non-Proton (EBRT): 77.6%
- Protons: 83.0%

p-value=0.067
